# Supplementary material for: Two phases of Ga2S3: promising infrared second-order nonlinear optical materials with very high laser induced damage thresholds
Source: Royal Society of Chemistry journal article supplement (doi:10.1039/c3tc30808a), 2013-01-01
Supplement: c3tc30808a.pdf [file c3tc30808a.pdf]

Supporting Information

Table S1 Bond lengths (Å) and angles (°).

| monoclinic Ga <sub>2</sub> S <sub>3</sub> <sup>a</sup> |            | cubic Ga <sub>2</sub> S <sub>3</sub> <sup>b</sup> |           |
|--------------------------------------------------------|------------|---------------------------------------------------|-----------|
| Ga(1)-S(1)                                             | 2.200(2)   | Ga(1)-S(1)                                        | 2.2547(6) |
| Ga(1)-S(2)#1                                           | 2.3102(19) | Ga(1)-S(1)#1                                      | 2.2547(6) |
| Ga(1)-S(3)                                             | 2.3207(17) | Ga(1)-S(1)#2                                      | 2.2547(6) |
| Ga(1)-S(2)                                             | 2.326(2)   | Ga(1)-S(1)#3                                      | 2.2547(6) |
| Ga(2)-S(1)                                             | 2.196(2)   | S(1)-Ga(1)#4                                      | 2.2547(6) |
| Ga(2)-S(2)#2                                           | 2.3111(18) | S(1)-Ga(1)#5                                      | 2.2547(6) |
| Ga(2)-S(3)#3                                           | 2.312(2)   | S(1)-Ga(1)#6                                      | 2.2547(6) |
| Ga(2)-S(3)#4                                           | 2.3279(18) |                                                   |           |
| S(2)-Ga(1)#3                                           | 2.3102(19) |                                                   |           |
| S(2)-Ga(2)#5                                           | 2.3111(18) |                                                   |           |
| S(3)-Ga(2)#1                                           | 2.312(2)   |                                                   |           |
| S(3)-Ga(2)#6                                           | 2.3279(18) |                                                   |           |
|                                                        |            |                                                   |           |
| S(1)-Ga(1)-S(2)#1                                      | 112.67(8)  | S(1)-Ga(1)-S(1)#1                                 | 109.5     |
| S(1)-Ga(1)-S(3)                                        | 111.40(7)  | S(1)-Ga(1)-S(1)#2                                 | 109.5     |
| S(2)#1-Ga(1)-S(3)                                      | 107.98(7)  | S(1)#1-Ga(1)-S(1)#2                               | 109.5     |
| S(1)-Ga(1)-S(2)                                        | 115.70(8)  | S(1)-Ga(1)-S(1)#3                                 | 109.5     |
| S(2)#1-Ga(1)-S(2)                                      | 106.36(7)  | S(1)#1-Ga(1)-S(1)#3                               | 109.5     |
| S(3)-Ga(1)-S(2)                                        | 101.94(7)  | S(1)#2-Ga(1)-S(1)#3                               | 109.5     |
| S(1)-Ga(2)-S(2)#2                                      | 110.96(7)  | Ga(1)-S(1)-Ga(1)#4                                | 109.5     |
| S(1)-Ga(2)-S(3)#3                                      | 114.69(8)  | Ga(1)-S(1)-Ga(1)#5                                | 109.5     |
| S(2)#2-Ga(2)-S(3)#3                                    | 109.26(8)  | Ga(1)#4-S(1)-Ga(1)#5                              | 109.5     |
| S(1)-Ga(2)-S(3)#4                                      | 110.48(8)  | Ga(1)-S(1)-Ga(1)#6                                | 109.5     |
| S(2)#2-Ga(2)-S(3)#4                                    | 106.01(7)  | Ga(1)#4-S(1)-Ga(1)#6                              | 109.5     |
| S(3)#3-Ga(2)-S(3)#4                                    | 104.94(7)  | Ga(1)#5-S(1)-Ga(1)#6                              | 109.5     |

|                      |           |
|----------------------|-----------|
| Ga(2)-S(1)-Ga(1)     | 105.78(9) |
| Ga(1)#3-S(2)-Ga(2)#5 | 109.35(7) |
| Ga(1)#3-S(2)-Ga(1)   | 102.74(7) |
| Ga(2)#5-S(2)-Ga(1)   | 109.38(8) |
| Ga(2)#1-S(3)-Ga(1)   | 103.93(7) |
| Ga(2)#1-S(3)-Ga(2)#6 | 107.07(8) |
| Ga(1)-S(3)-Ga(2)#6   | 111.36(8) |

<sup>a</sup>Symmetry codes: (#1)  $x, -y, z+1/2$ ; (#2)  $x+1/2, -y-1/2, z+1/2$ ; (#3)  $x, -y, z-1/2$ ; (#4)  $x, y-1, z$ ; (#5)  $x-1/2, -y-1/2, z-1/2$ ; (#6)  $x, y+1, z$ .

<sup>b</sup>Symmetry codes: (#1)  $x-1/2, y-1/2, z$ ; (#2)  $x, y-1/2, z-1/2$ ; (#3)  $x-1/2, y, z-1/2$ ; (#4)  $x+1/2, y+1/2, z$ ; (#5)  $x, y+1/2, z+1/2$ ; (#6)  $x+1/2, y, z+1/2$ .

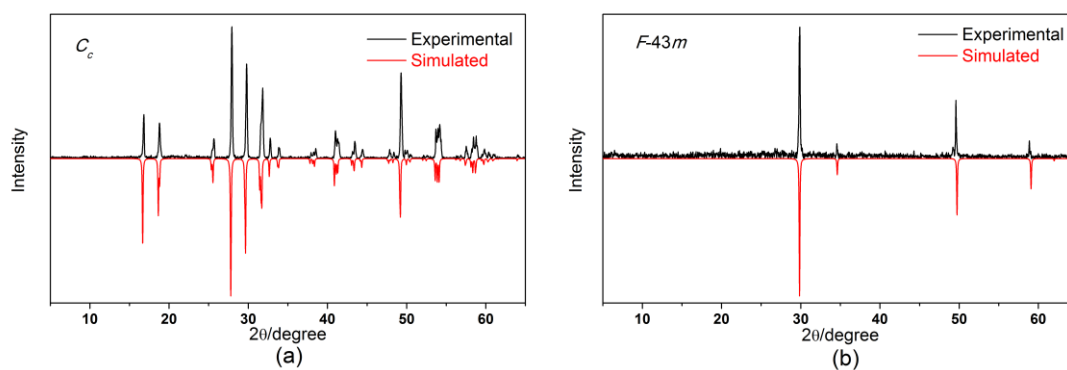

**Fig. S1** The experimental and simulated X-ray powder diffraction patterns of the monoclinic (a) and cubic Ga<sub>2</sub>S<sub>3</sub> (b).

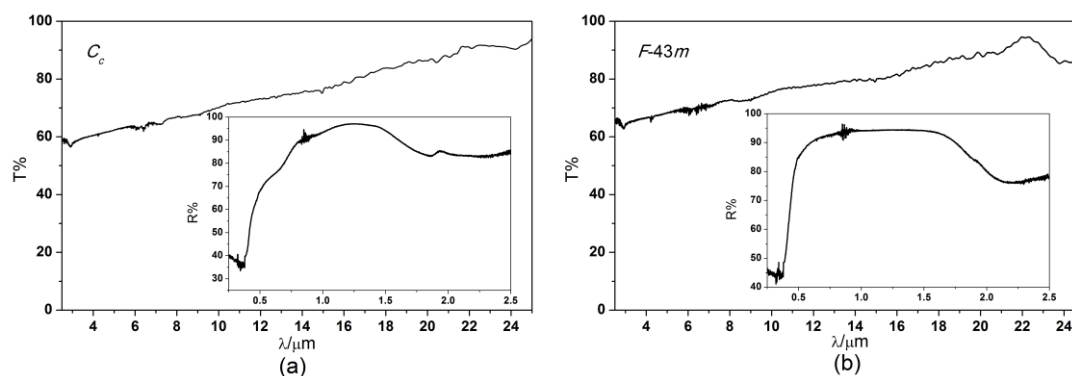

**Fig. S2** UV-Vis-NIR diffuse reflectance spectra (inset panel) and IR transmission spectra of monoclinic (a) and cubic Ga<sub>2</sub>S<sub>3</sub> (b).

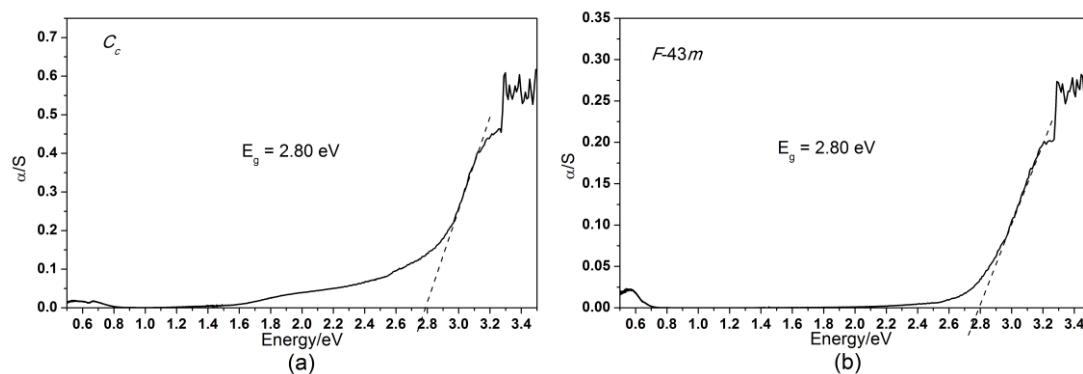

**Fig. S3** Optical diffuse reflectance spectra of the monoclinic (a) and cubic  $\text{Ga}_2\text{S}_3$  (b).

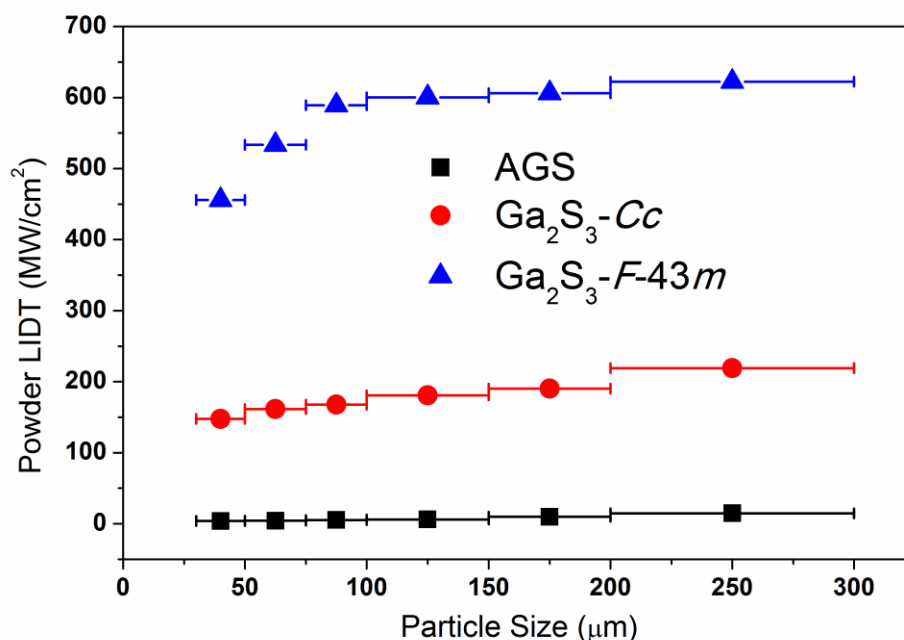

**Fig. S4** Particle size dependences of powder LIDT values for AGS, monoclinic and cubic  $\text{Ga}_2\text{S}_3$ .

The dependences of powder LIDT values versus particle size for AGS, monoclinic and cubic  $\text{Ga}_2\text{S}_3$  were investigated by our method. The experimental results were summarized and plotted in **Fig. S4**.

Firstly, the powder LIDT values increase with the particle size for these three compounds similarly, which could be explained by the decrease of defects per unit area as the increase of the particle size. It could be deduced that the phenomenon, which the powder LIDT values increase as the particle size, would be observed for all

compounds. Secondly, the powder LIDT values of monoclinic and cubic  $\text{Ga}_2\text{S}_3$  are always larger than those of the corresponding AGS with the same particle size. Those situations also reflect the accuracy and reliability of our method and prove that the method is an effective and semiquantitative method to evaluate the powder LIDT values for new NLO compounds.

Considering that the samples synthesized by solid-state reactions are mainly distributed in the particle size range of 75-150  $\mu\text{m}$ , the particle size range of 75-150  $\mu\text{m}$  is preferred to be adopted for comparatively parallel contrast between our title compounds and AGS, which also simplifies the test method.

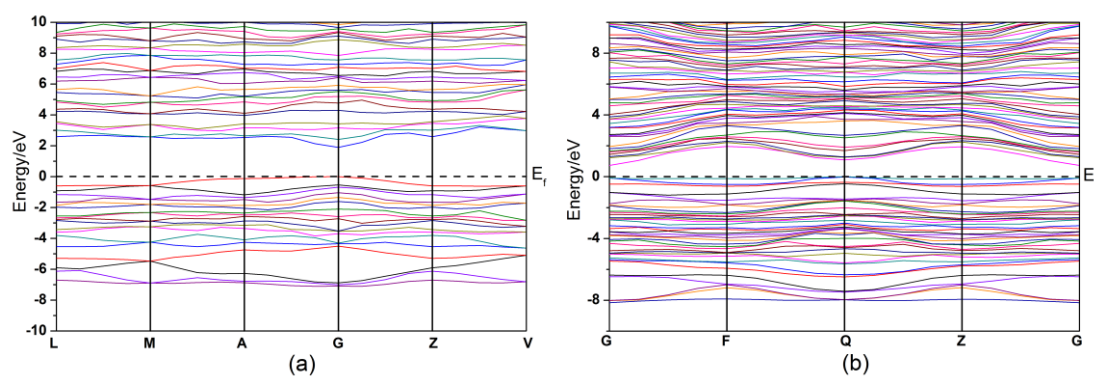

**Fig. S5** The band structures of monoclinic (a) and cubic  $\text{Ga}_2\text{S}_3$  (b).

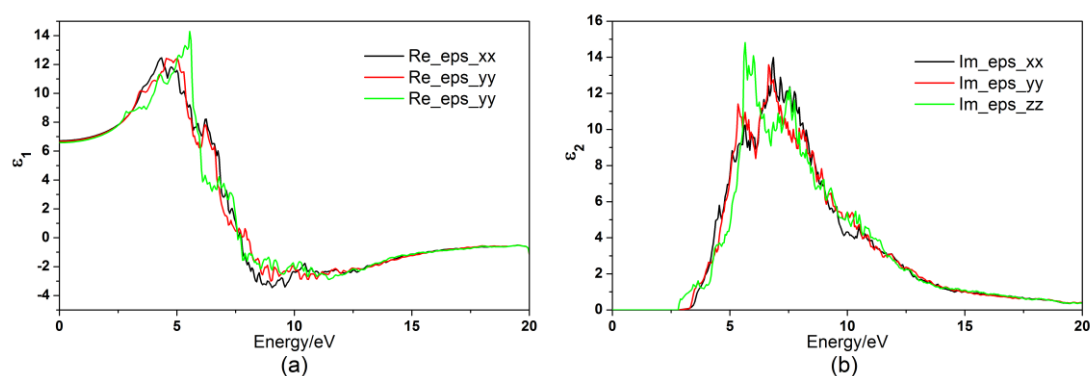

**Fig. S6** Energy dependences of the real part  $\epsilon_1$  (a) and the imaginary part  $\epsilon_2$  (b) of monoclinic  $\text{Ga}_2\text{S}_3$ .

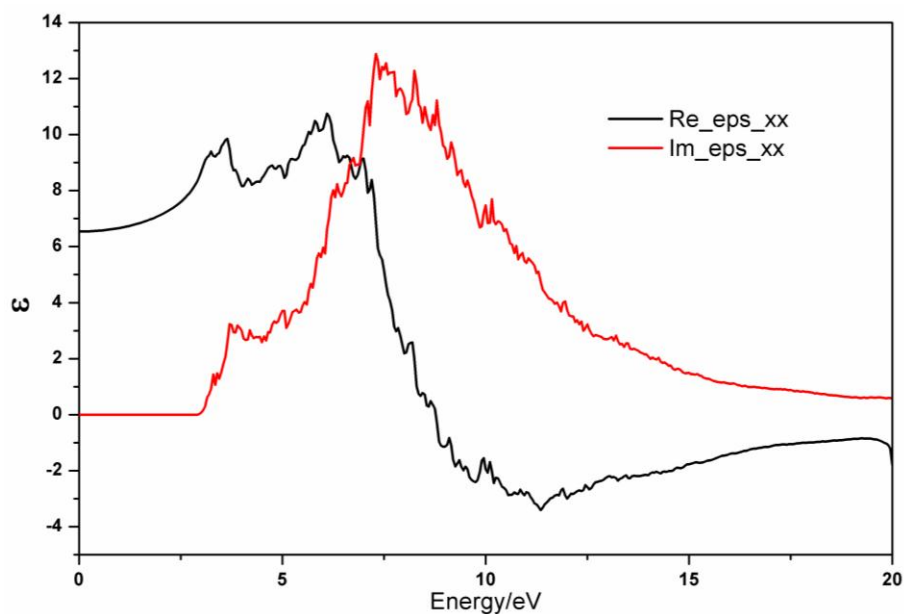

**Fig. S7** Energy dependences of the real part  $\epsilon_1$  and the imaginary part  $\epsilon_2$  of cubic  $\text{Ga}_2\text{S}_3$ .

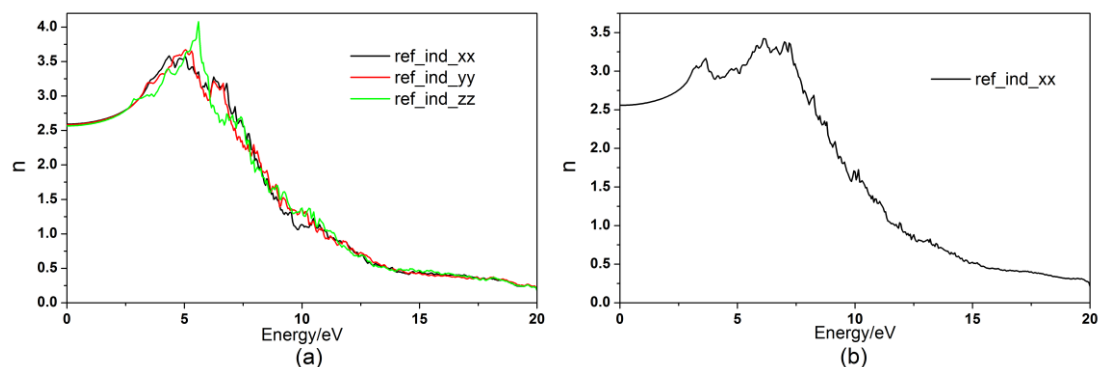

**Fig. S8** Variations of the calculated refractive index  $n$  of monoclinic (a) and cubic  $\text{Ga}_2\text{S}_3$  (b).

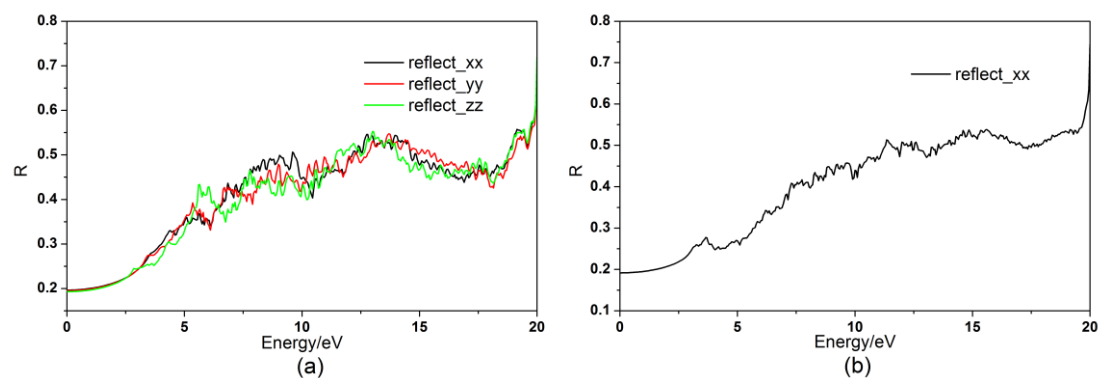

**Fig. S9** Calculated reflectivity  $R$  of monoclinic (a) and cubic  $\text{Ga}_2\text{S}_3$  (b).

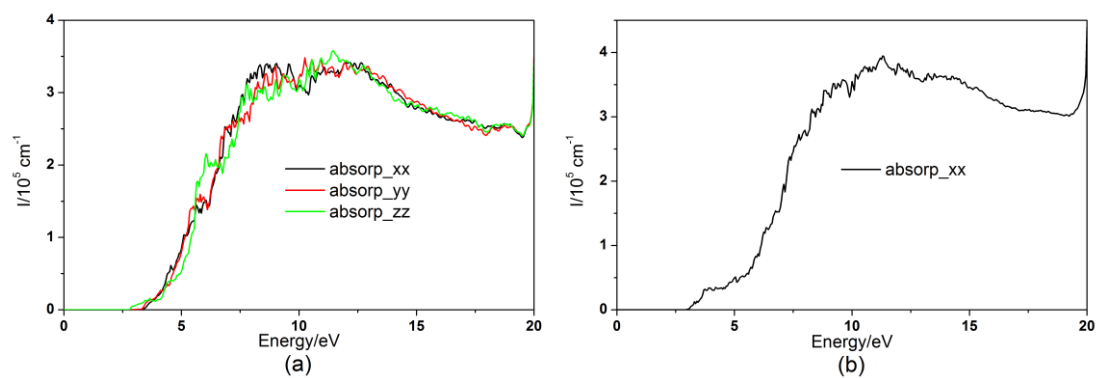

**Fig. S10** Calculated absorption coefficient  $I$  of monoclinic (a) and cubic  $\text{Ga}_2\text{S}_3$  (b).

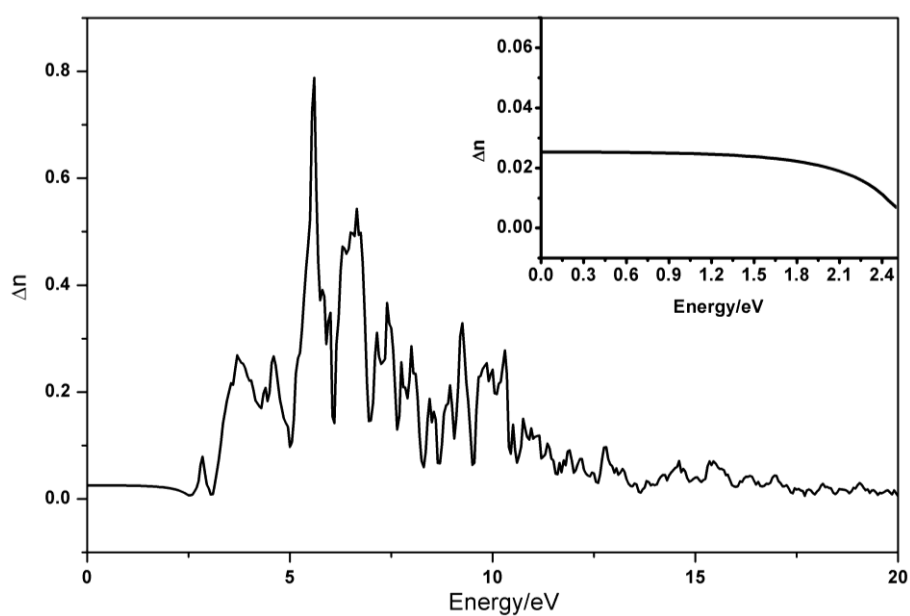

**Fig. S11** Calculated birefringence  $\Delta n$  of monoclinic  $\text{Ga}_2\text{S}_3$ .
